# Supplementary material for: Cell-Penetrant, Nanomolar O-GlcNAcase Inhibitors Selective against Lysosomal Hexosaminidases
Source: PubMed Central journal article supplement (PMC3032886; doi:10.1016/j.chembiol.2010.09.014), 2010-11-24

Chemistry & Biology 17

**Supplemental Information**

**Cell-Penetrant, Nanomolar O-GlcNAcase Inhibitors**

**Selective against Lysosomal Hexosaminidases**

**Helge C. Dorfmueller, Vladimir S. Borodkin, Marianne Schimpl, Xiaowei Zheng,  
Robert Kime, Kevin D. Read, and Daan M.F. van Aalten**

# Supplementary information

## Supplementare Figure S1

Thumbnail images of immunostained HEK293 cells treated with series concentration of GlcNAcstatin G and H as indicated (0.03 nM to 3  $\mu$ M). Immunostaining using an *O*-GlcNAc antibody (RL2) shows an elevation of total *O*-GlcNAc modification (Top) which correlates with the increased concentrations of the inhibitors. The data were collected from experiments carried out in quadruplicate and normalized with DAPI stain (Bottom). Nine frames were shot from each well. The EC<sub>50</sub> values of GlcNAcstatin G and H were determined and zoom in images at select concentrations are shown in Fig. 3B.

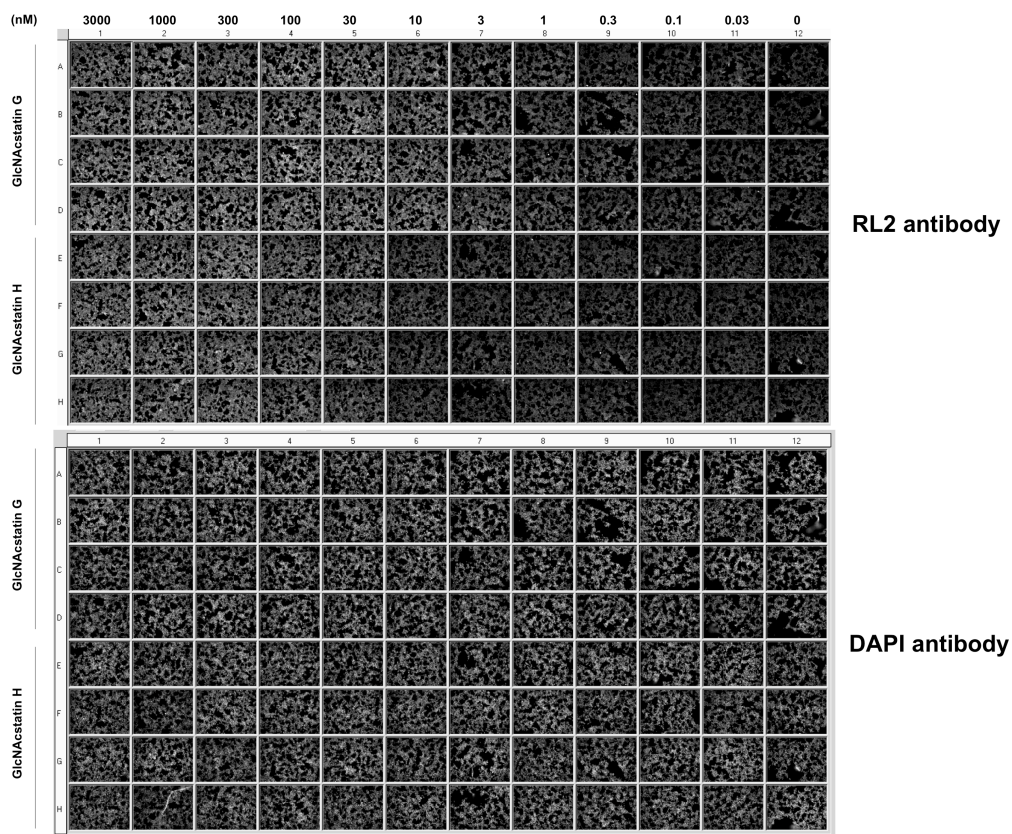

Supplement: mmc1.pdf [file mmc1.pdf]
